# Supplementary material for: Hierarchically micro/nanostructured porous metallic copper: Convenient growth and superhydrophilic and catalytic performance
Source: Royal Society of Chemistry journal article supplement (doi:10.1039/c2jm35233h), 2012-01-01
Supplement: c2jm35233h.pdf [file c2jm35233h.pdf]

# **Hierarchically micro/nanostructured porous metallic copper: convenient growth and superhydrophilic and catalytic performance**

Shuyan Gao,<sup>1,\*</sup> Xiaoxia Jia,<sup>1</sup> Jianmao Yang,<sup>2</sup> Xianjun Wei<sup>1</sup>

1. College of Chemistry and Environmental Sciences, Henan Normal University, 46  
Jianshe street, Xinxiang, 453007, Henan, P. R. China.

2. Research Center for Analysis and Measurement, Donghua University, Shanghai,  
201620, P. R. China

Tel: +86-373-3326335; Fax: +86-373-3326544

E-mail: shuyangao@htu.cn

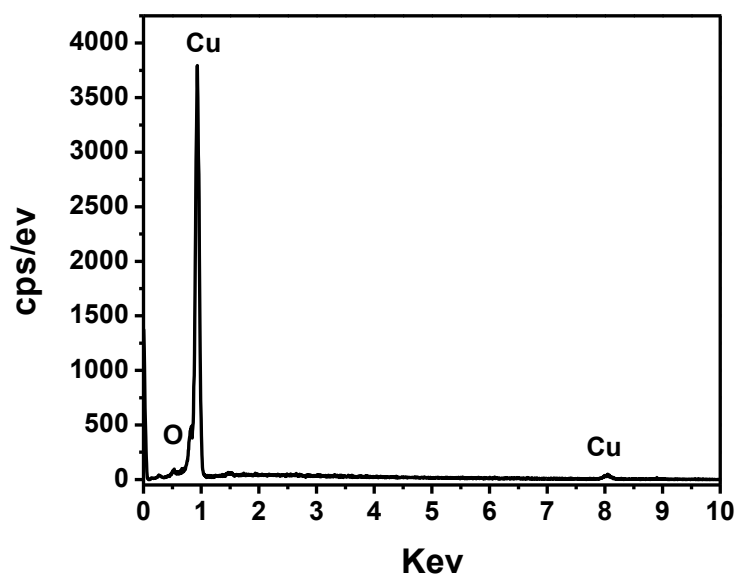

**Fig. S1.** EDX spectroscopy of the sample.

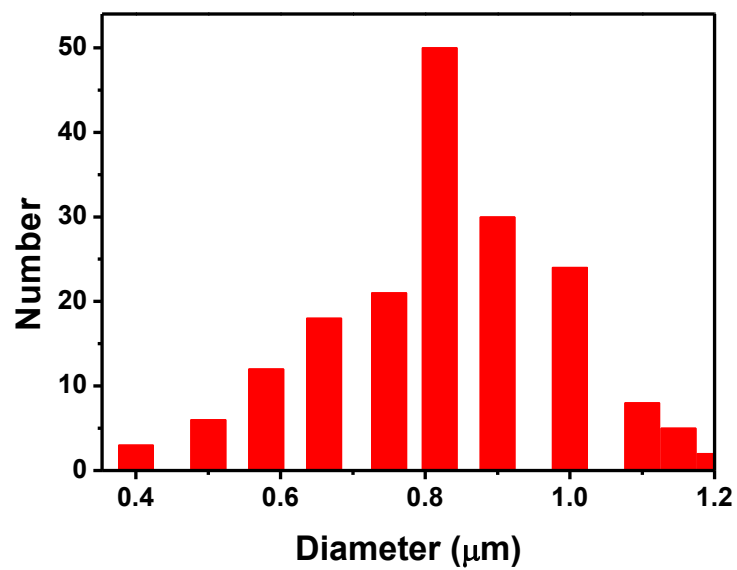

**Fig. S2.** Size distribution of the sample.

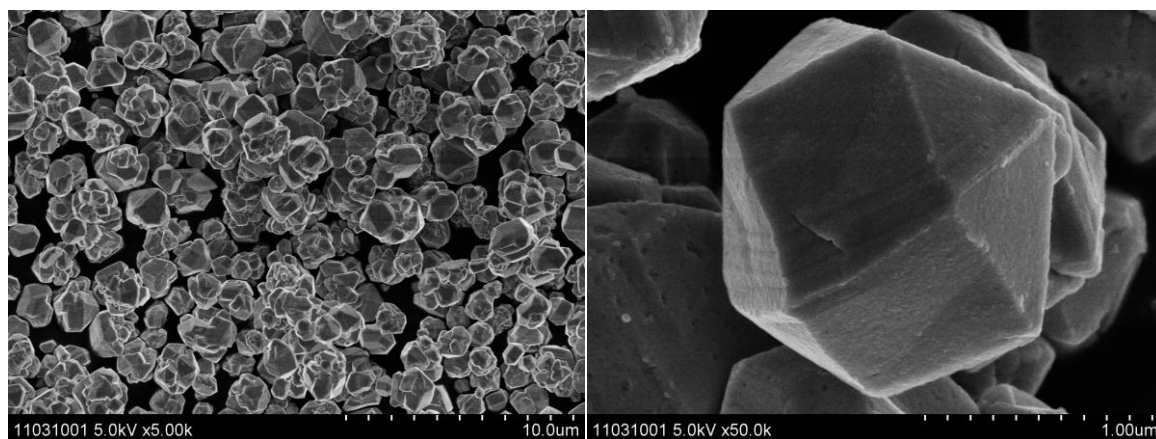

**Fig. S3.** FESEM image of Cu prepared in the absence of phenol.

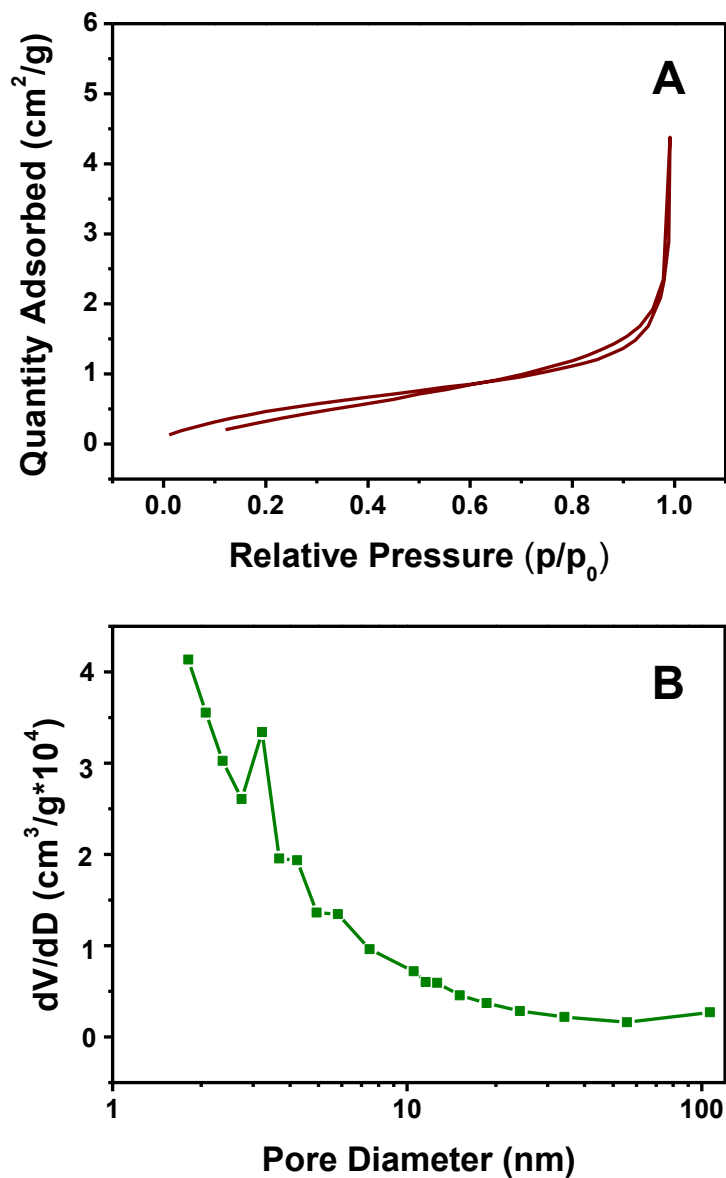

**Fig. S4.** (A) N<sub>2</sub> adsorption–desorption isotherms of the sample. (B) Pore size distribution of the sample calculated from the desorption branch of the isotherms using the BJH algorithm.

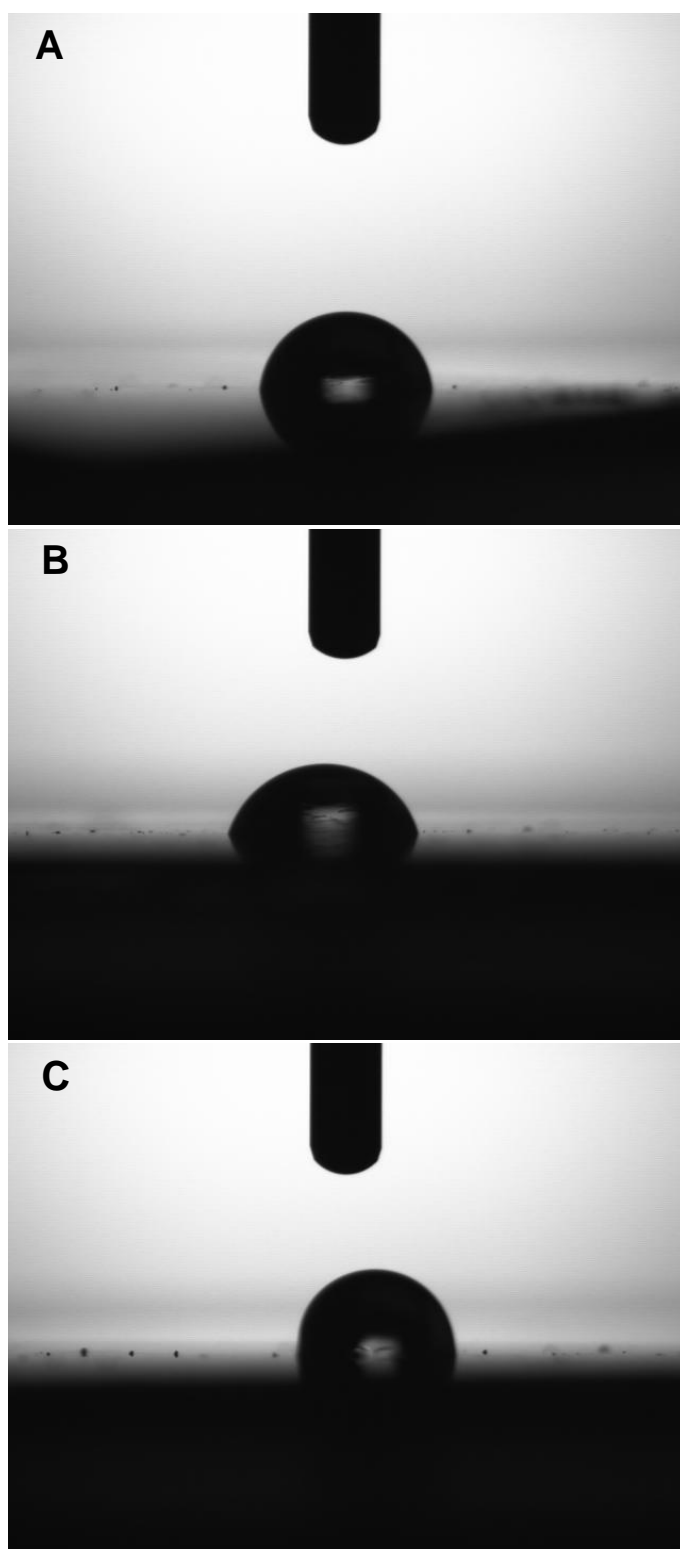

Fig. S5 The final state of the water CA of the nonporous Cu prepared by similar method (A), commercial Cu powders (B), and commercial Cu sheet (C).

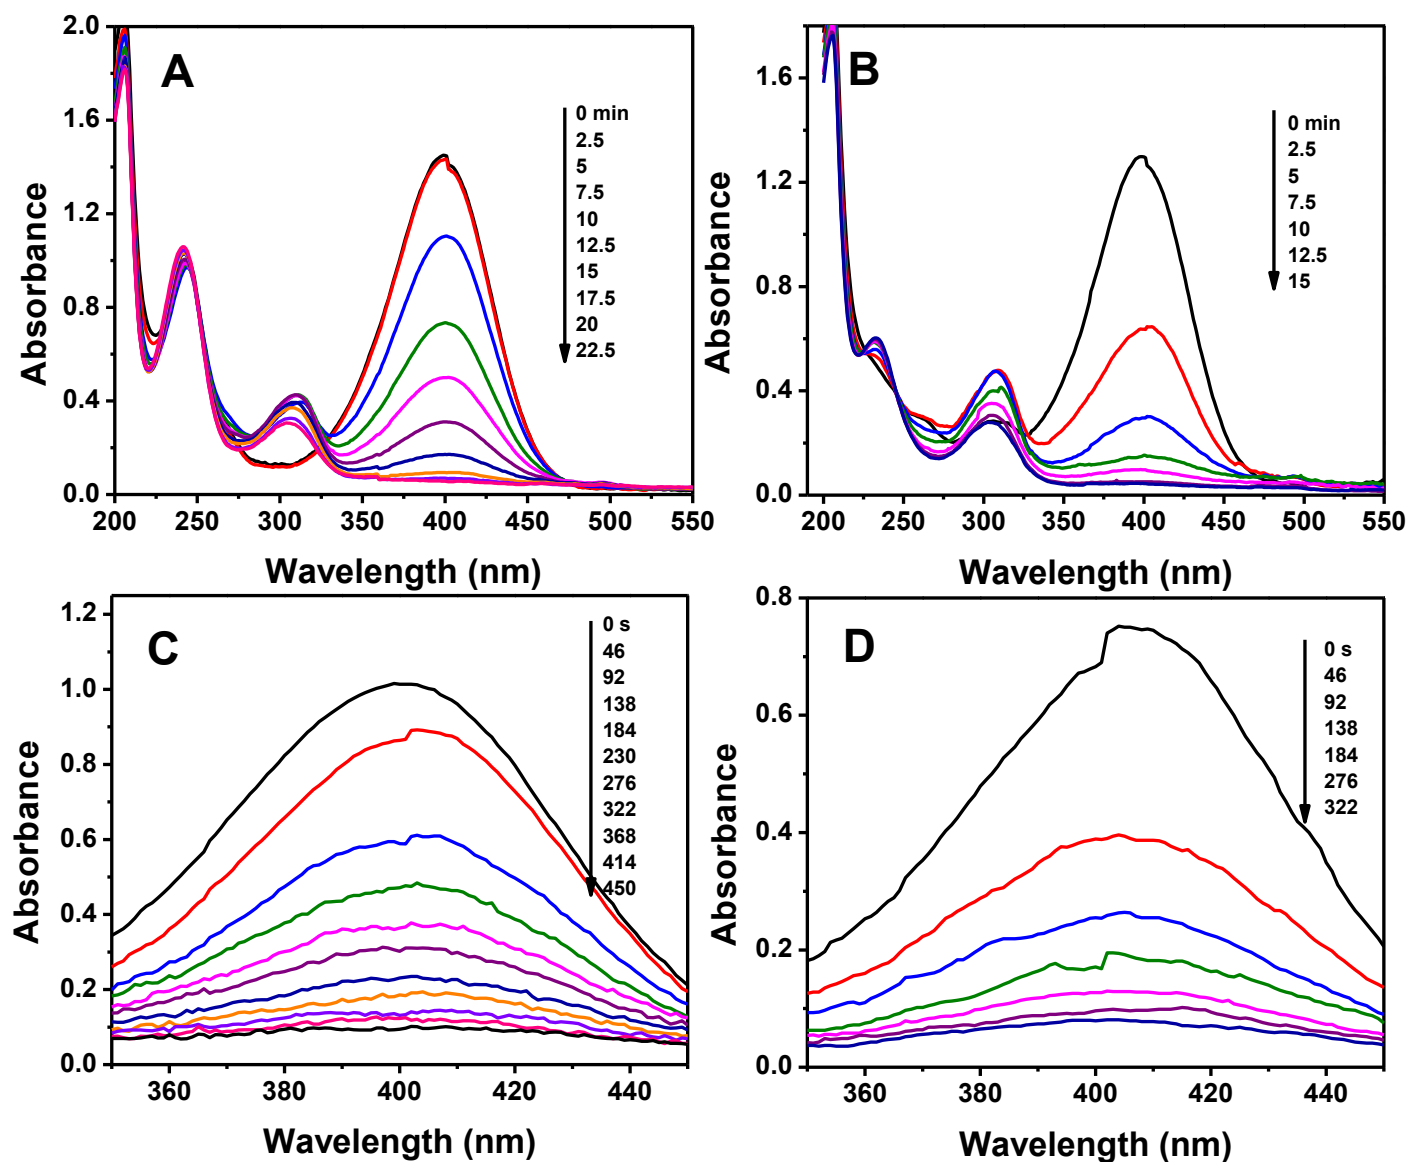

**Fig. S6.** UV-Vis spectra of 4-NP in the presence of the porous Cu microspheres at 278K (A), 288K (B), 298K (C), and 308K (D).
